# Supplementary material for: Loss of FOXA2 induces ER stress and hepatic steatosis and alters developmental gene expression in human iPSC-derived hepatocytes
Source: PubMed Central journal article supplement (PMC9381545; doi:10.1038/s41419-022-05158-0), 2022-08-16
Supplement: 41419_2022_5158_MOESM6_ESM.pdf [file 41419_2022_5158_MOESM6_ESM.pdf]

Supplementary Fig. 6

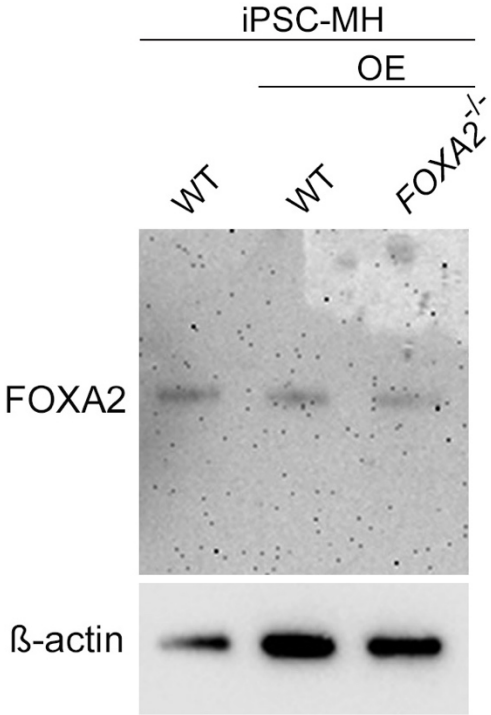

**Supplementary Fig. 6.** Western blotting for FOXA2 expression in mature hepatocytes (MH) derived from WT and FOXA2<sup>-/-</sup> hepatic progenitors (HP) transfected with FOXA2 plasmid. There was no significant difference in the FOXA2 protein levels between different conditions.
