# Supplementary material for: Loss of FOXA2 induces ER stress and hepatic steatosis and alters developmental gene expression in human iPSC-derived hepatocytes
Source: PubMed Central journal article supplement (PMC9381545; doi:10.1038/s41419-022-05158-0), 2022-08-16

Original Western blotting presented in **Figure 1C**

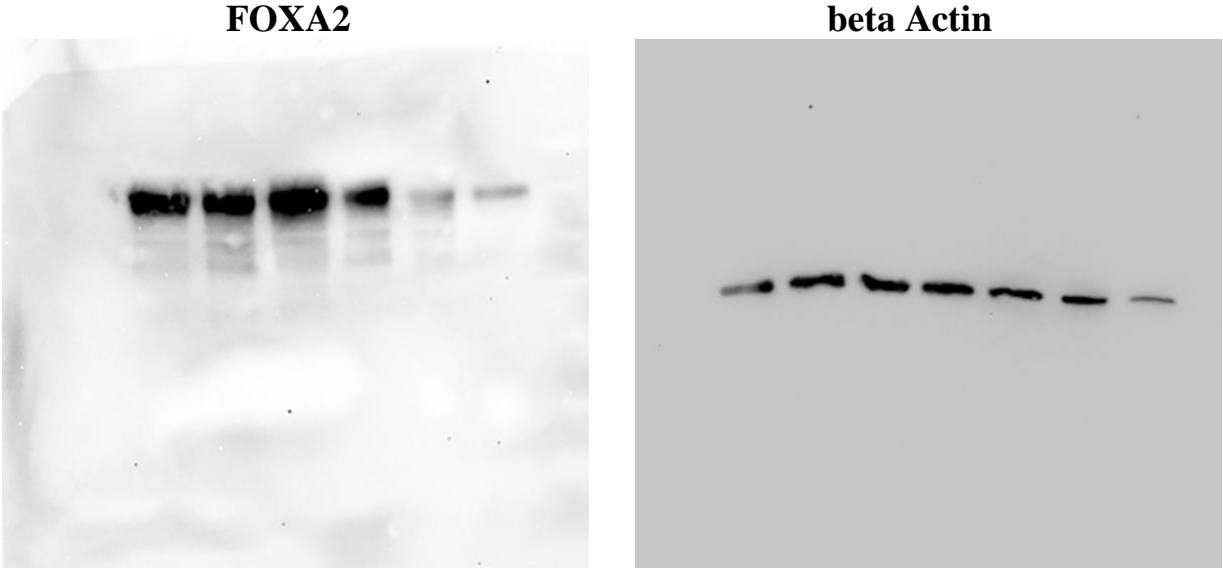

Original Western blotting presented in **Figure 1E**

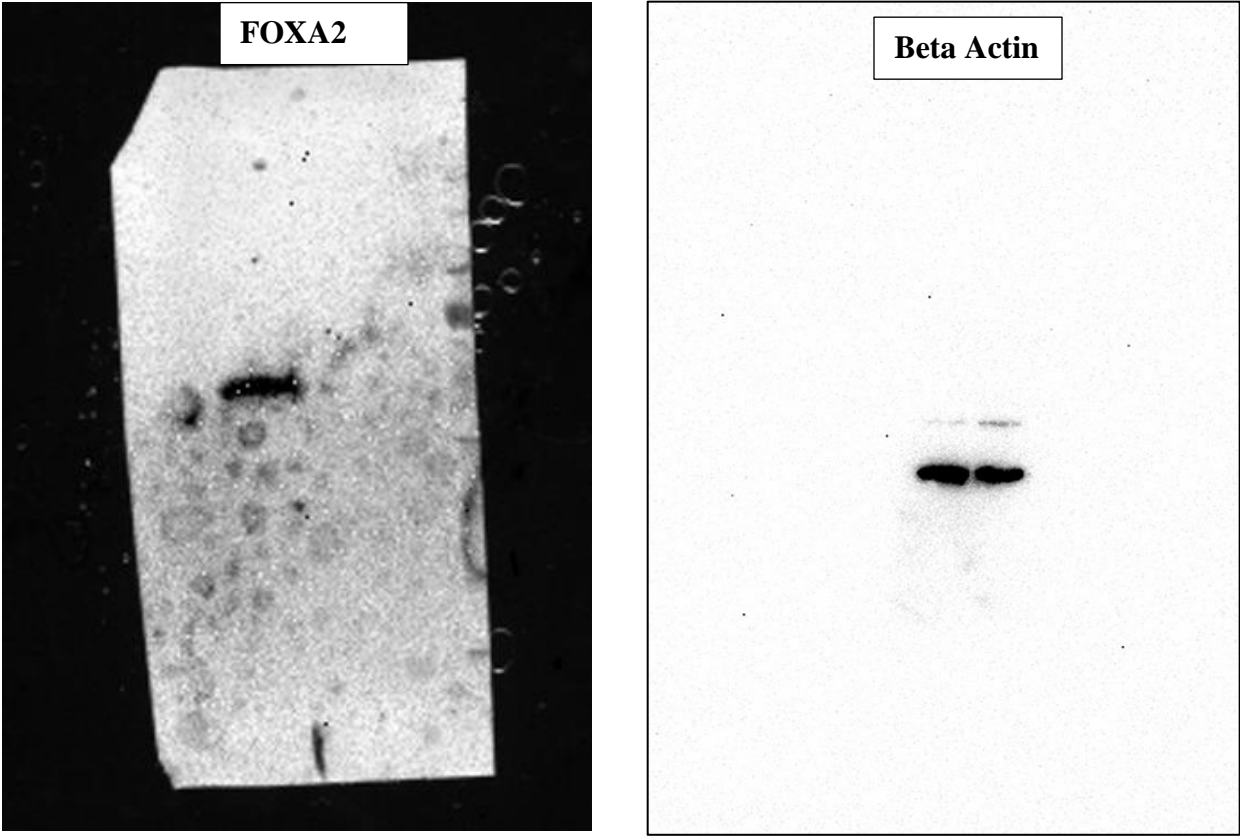

Original Western blotting presented in **Figure 2C**

**AFP**

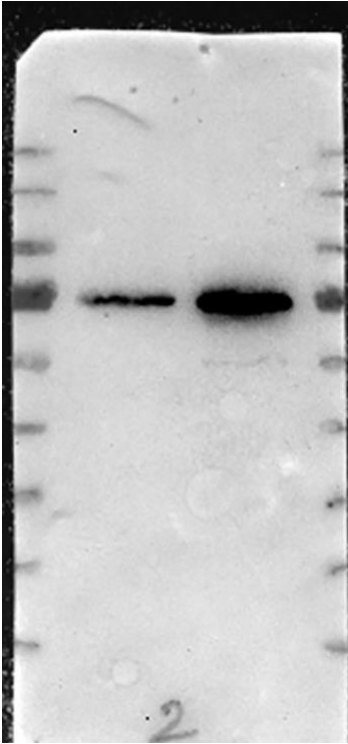

**beta Actin**

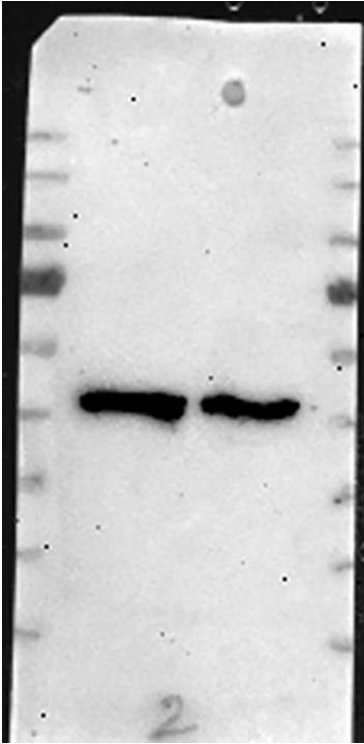

Original Western blotting presented in **Figure 2F**

**ALBUMIN**

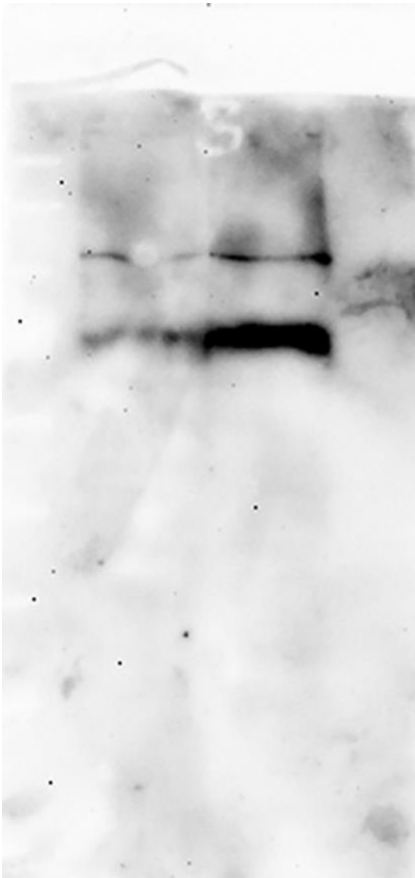

**Beta Actin**

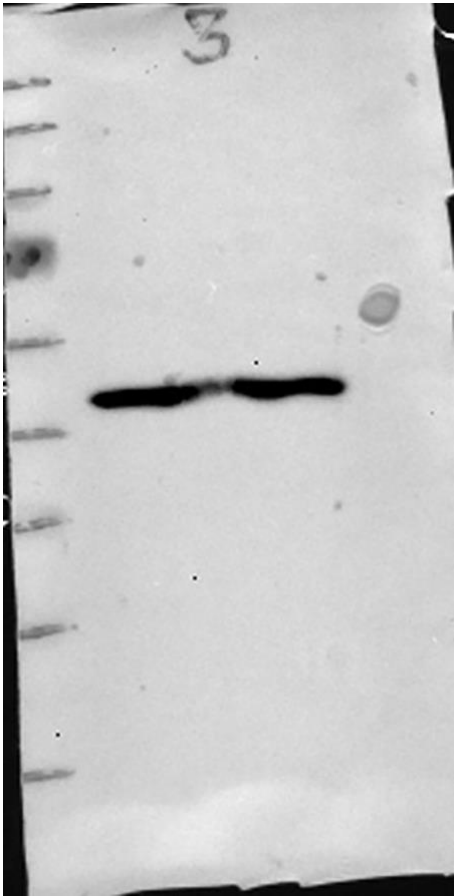

Original Western blotting presented in **Figure 6E**

**Phospho AKT**

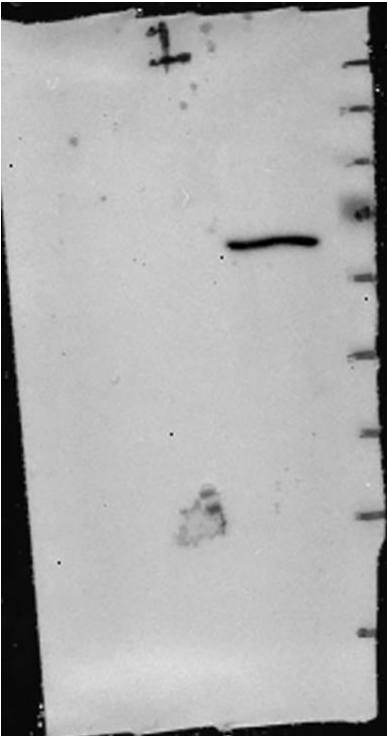

**Total AKT**

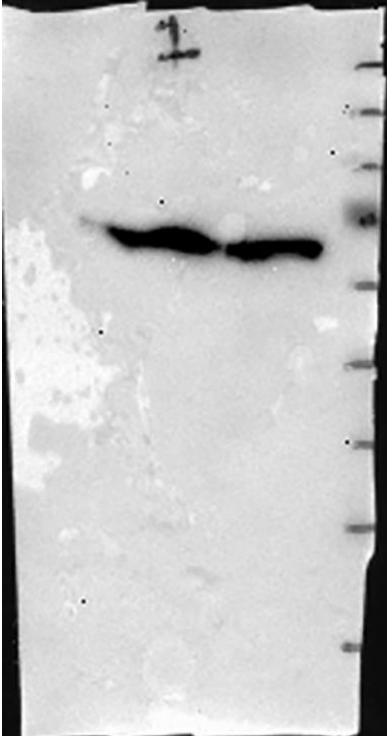

Original Western blotting presented in **Figure 7**

**Phospho ERK**

**Total ERK**

**Beta Actin**

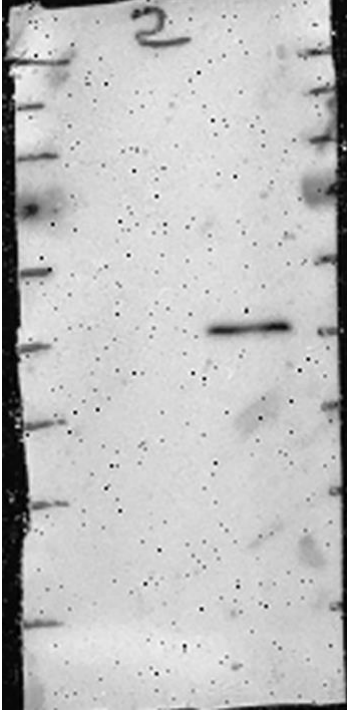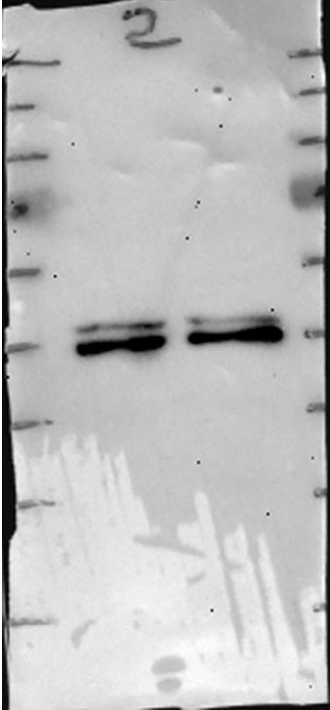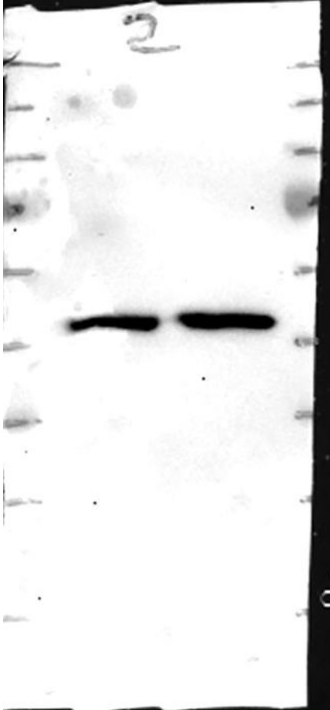

Supplement: 41419_2022_5158_MOESM14_ESM.pdf [file 41419_2022_5158_MOESM14_ESM.pdf]
